# Supplementary material for: Destabilization of LiBH4dehydrogenation through H+–H−interactions by cooperating with alkali metal hydroxides
Source: Royal Society of Chemistry journal article supplement (doi:10.1039/c3ra45847d), 2013-12-03
Supplement: c3ra45847d.pdf [file c3ra45847d.pdf]

Supplementary Information

## **Destabilization of LiBH<sub>4</sub> dehydrogenation through H<sup>+</sup>-H<sup>-</sup> interactions by cooperating with alkali metal hydroxides**

Weitong Cai,<sup>a,b</sup> Hui Wang,<sup>a,b</sup> Dalin Sun,<sup>c,\*</sup> Qingan Zhang,<sup>d</sup> Xiangdong Yao<sup>e,\*</sup> and Min Zhu<sup>a,b,\*</sup>

<sup>a</sup> *School of Materials Science and Engineering, South China University of Technology, Guangzhou 510640, P. R. China.*

<sup>b</sup> *Key Laboratory of Advanced Energy Storage Materials of Guangdong Province, Guangzhou 510640, P. R. China.*

<sup>c</sup> *Department of Materials Science, Fudan University, Shanghai 200433, P. R. China.*

<sup>d</sup> *School of Materials Science and Engineering, Anhui University of Technology, Maanshan, Anhui 243002, P. R. China.*

<sup>e</sup> *Queensland Micro- and Nanotechnology Center (QMNC), Griffith University, Brisbane, Australia.*

\* Corresponding authors:

Prof. M. Zhu

E-mail: memzhu@scut.edu.cn

Tel: +86-20-87113924

Prof. D. L. Sun

E-mail: dlsun@fudan.edu.cn

Tel: +86-21-65642873

Prof. X. D. Yao

E-mail: x.yao@griffith.edu.au

### Supplementary Information

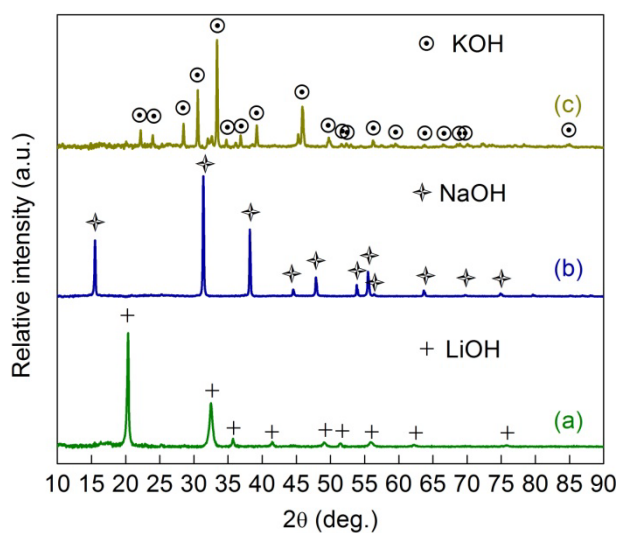

Figure S1 XRD patterns of ball-milled (a): LiOH, (b): NaOH, (c): KOH.

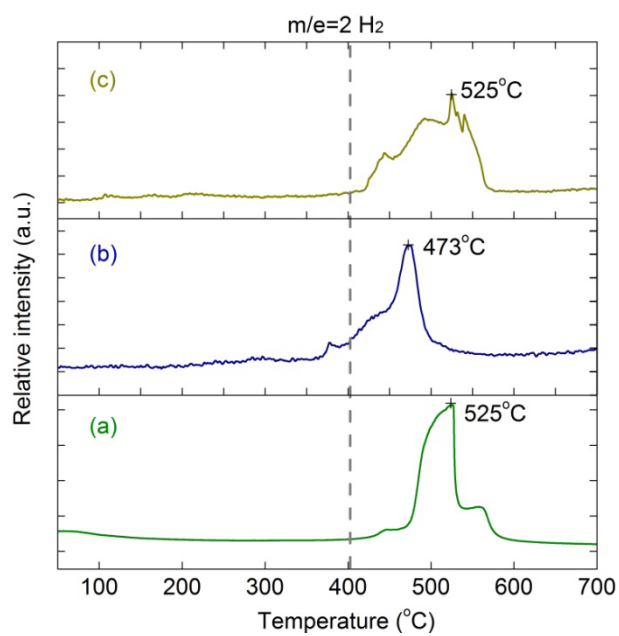

Figure S2 TPD-MS results of ball-milled (a): LiOH, (b): NaOH, (c): KOH. Hydrogen was liberated from hydroxides at elevated temperatures  $> 400$  °C.
